# Supplementary material for: Co-occurring expression and methylation QTLs allow detection of common causal variants and shared biological mechanisms
Source: PubMed Central journal article supplement (PMC5824840; doi:10.1038/s41467-018-03209-9), 2018-02-23
Supplement: 41467_2018_3209_MOESM3_ESM.pdf [file 41467_2018_3209_MOESM3_ESM.pdf]

## **Description of Additional Supplementary Files**

### **File Name: Supplementary Data 1**

**Description:** Characteristics of eQTL-meQTL pairs and results of co-localization analyses.

### **File Name: Supplementary Data 2**

**Description:** Linear regression of the posterior probabilities of common causal variant on lead eSNP LD-score and the eQTL/meQTL P-values.

### **File Name: Supplementary Data 3**

**Description:** Results from mediation analyses and partial correlation analyses.

### **File Name: Supplementary Data 4**

**Description:** Results from partial correlation analyses adjusting for top two lead SNPs.
